# Supplementary material
Source: publisher figshare collection journal article supplement (https://acs.figshare.com/ndownloader/files/12764714)
Supplement: Supplementary file 1 [file 12764714]

## Supporting Information

# Computational design of functionalized substrate for capturing nanoparticles with specific size and shape

Lin Shen,<sup>1</sup> Hong-ming Ding<sup>1,\*</sup> and Yu-qiang Ma<sup>1,2,\*</sup>

<sup>1</sup> Center for Soft Condensed Matter Physics and Interdisciplinary Research, Soochow University, Suzhou 215006, China.

<sup>2</sup> National Laboratory of Solid State Microstructures and Department of Physics, Collaborative Innovation Center of Advanced Microstructures, Nanjing University, Nanjing 210093, China.

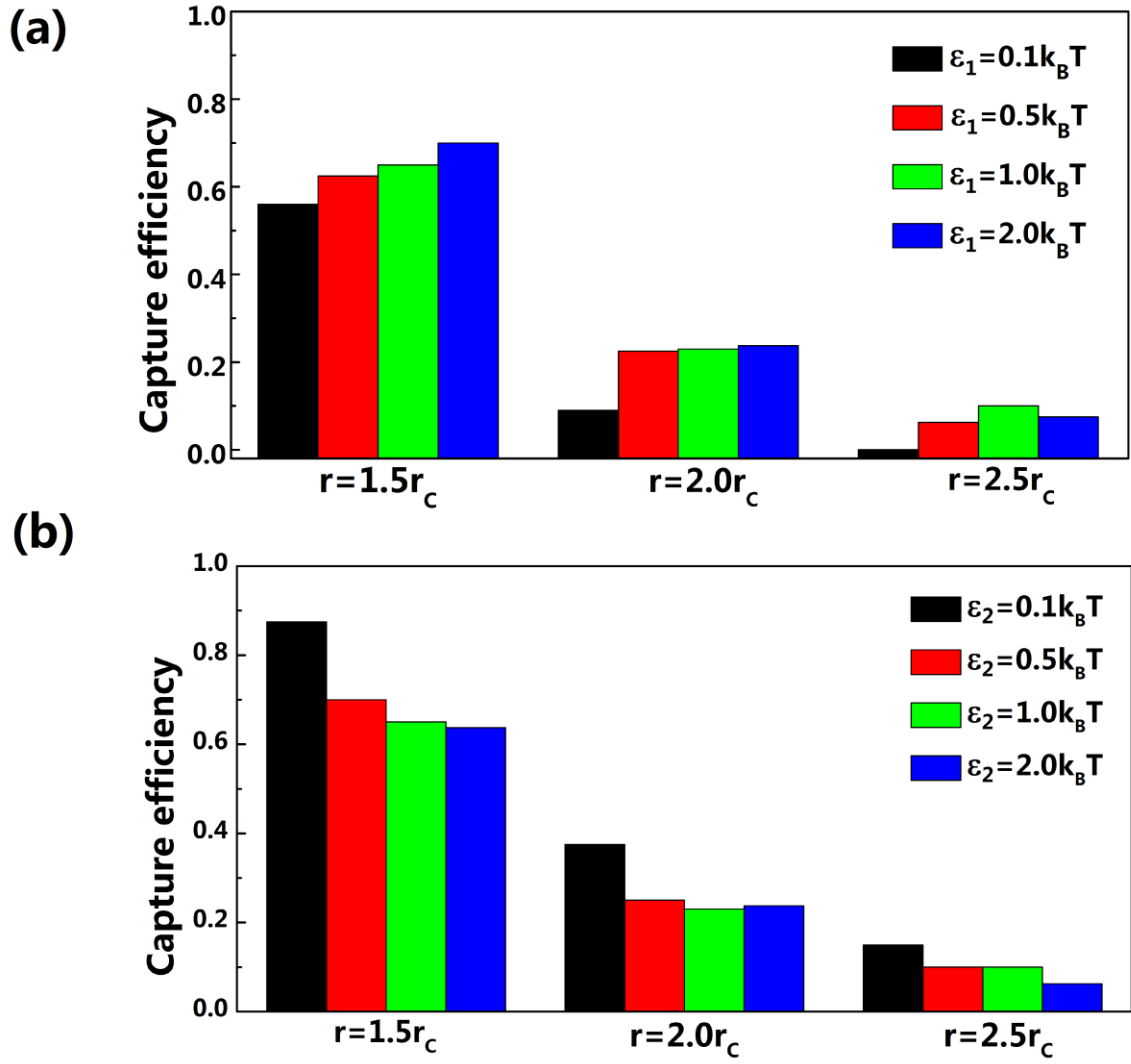

**Figure S1.** The capture efficiency of spherical nanoparticles as a function of the nanoparticle size under different interaction parameters. (a) The strength of the attractive interaction ( $\epsilon_1$ ) between the nanoparticle and the specific part of copolymers changes from 0.1  $k_B T$  to 2.0  $k_B T$ , where the strength of the repulsive interaction ( $\epsilon_2$ ) between the nanoparticle and the non-specific part of copolymers is fixed as 1.0  $k_B T$ . (b) The repulsive interaction ( $\epsilon_2$ ) changes from 0.1  $k_B T$  to 2.0  $k_B T$ , where the strength of attractive interaction ( $\epsilon_1$ ) is fixed as 1.0  $k_B T$ .

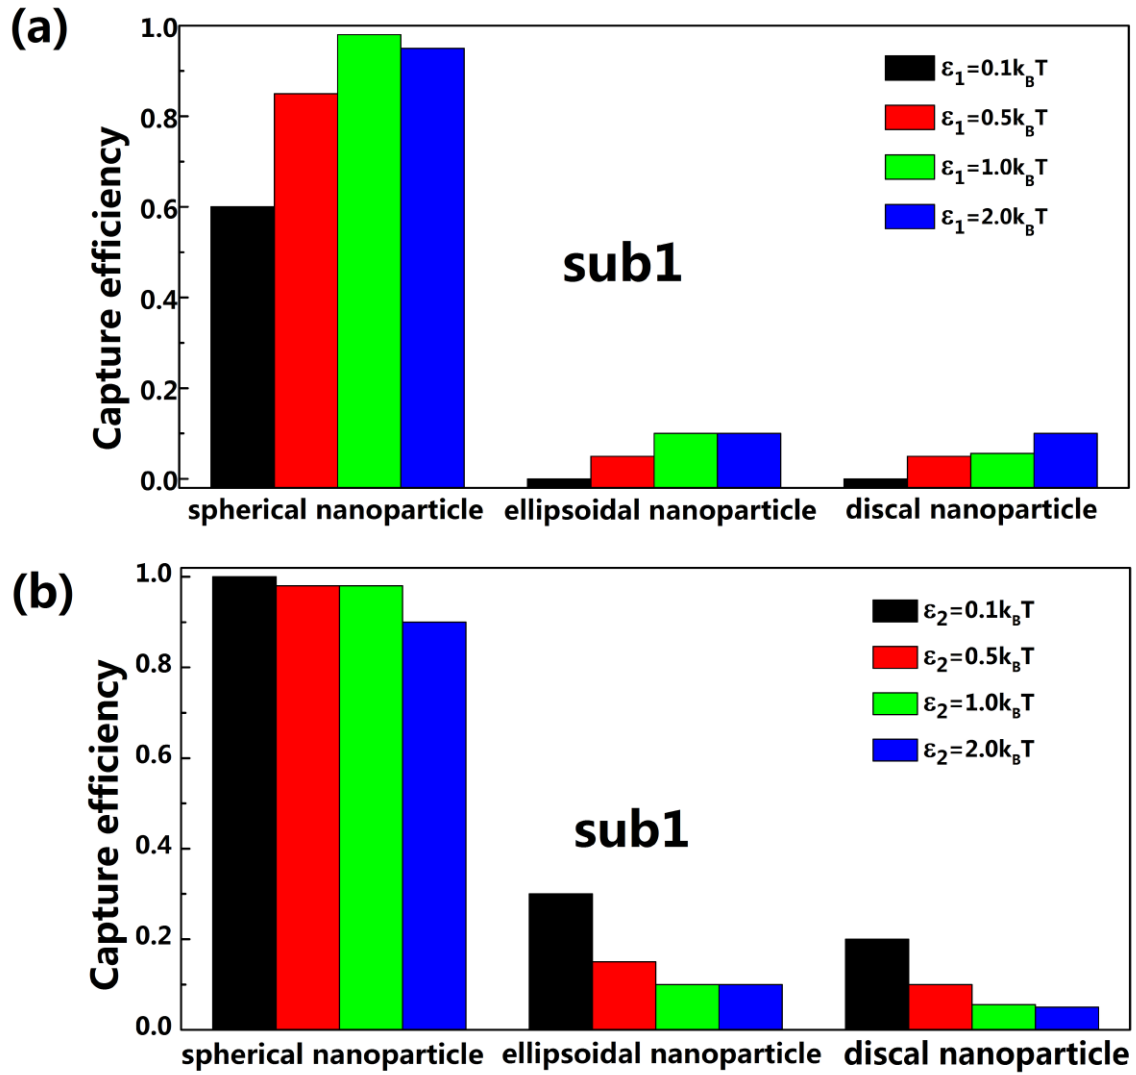

**Figure S2.** The capture efficiency of nanoparticles with different shapes under different interaction parameters when the hole in the substrate is sphere. (a) The strength of the attractive interaction ( $\epsilon_1$ ) between the nanoparticle and the specific part of copolymers changes from 0.1  $k_B T$  to 2.0  $k_B T$ , where the strength of the repulsive interaction ( $\epsilon_2$ ) between the nanoparticle and the non-specific part of copolymers is fixed as 1.0  $k_B T$ . (b) The repulsive interaction ( $\epsilon_2$ ) changes from 0.1  $k_B T$  to 2.0  $k_B T$ , where the strength of attractive interaction ( $\epsilon_1$ ) is fixed as 1.0  $k_B T$ .
